# Supplementary material for: Soil Arthropod Community in Spruce Forests (Picea abies) Affected by a Catastrophic Storm Event
Source: MDPI journal article supplement (doi:10.3390/d14060440), 2022-05-30
Supplement: s1 [file s1]

Table S1. Mean  $\pm$  st.err. of pH, SOM (%) and carbonate (%) in each site. With windthrow sites in red. no-windthrow sites in orange and meadows in green.

| Site | pH              | SOM               | Carbonate       |
|------|-----------------|-------------------|-----------------|
| CA1  | 5.05 $\pm$ 0.28 | 61.81 $\pm$ 18.72 | 1.37 $\pm$ 0.20 |
| CA2  | 5.25 $\pm$ 0.68 | 54.05 $\pm$ 18.82 | 1.07 $\pm$ 0.43 |
| M1   | 5.59 $\pm$ 0.52 | 34.43 $\pm$ 3.37  | 1.31 $\pm$ 0.06 |
| M2   | 4.40 $\pm$ 0.26 | 77.40 $\pm$ 2.18  | 0.51 $\pm$ 0.08 |
| SN1  | 5.39 $\pm$ 0.35 | 28.21 $\pm$ 5.41  | 1.23 $\pm$ 0.05 |
| SN2  | 6.03 $\pm$ 0.05 | 26.65 $\pm$ 3.23  | 1.61 $\pm$ 0.05 |
| SN3  | 5.68 $\pm$ 0.04 | 33.75 $\pm$ 4.67  | 1.42 $\pm$ 0.12 |
| SN4  | 4.69 $\pm$ 0.04 | 63.59 $\pm$ 3.59  | 1.02 $\pm$ 0.08 |
| SN5  | 5.55 $\pm$ 0.29 | 29.46 $\pm$ 4.55  | 1.55 $\pm$ 0.21 |
| SN6  | 4.93 $\pm$ 0.22 | 40.38 $\pm$ 8.23  | 1.56 $\pm$ 0.37 |
| SN7  | 4.82 $\pm$ 0.08 | 65.80 $\pm$ 9.96  | 0.98 $\pm$ 0.21 |
| SN8  | 6.69 $\pm$ 0.26 | 81.92 $\pm$ 3.65  | 4.18 $\pm$ 0.71 |
| SN9  | 5.00 $\pm$ 0.22 | 25.29 $\pm$ 6.04  | 2.10 $\pm$ 0.24 |
| SN10 | 4.65 $\pm$ 0.08 | 63.99 $\pm$ 16.28 | 1.19 $\pm$ 0.27 |
| SN11 | 5.25 $\pm$ 0.30 | 24.71 $\pm$ 1.88  | 1.74 $\pm$ 0.03 |

Table S2. Mean  $\pm$  st.err. of the OTUs abundances (ind./m<sup>2</sup>) in each site. a) CA. b) M and c) SN localities. With windthrow sites in red. no-windthrow sites in orange and meadows in green.

| a)                      | CA1     |       |         | CA2     |       |         |
|-------------------------|---------|-------|---------|---------|-------|---------|
| Acarina (non Oribatida) | 3071.27 | $\pm$ | 1229.65 | 3524.18 | $\pm$ | 1510.02 |
| Acarina (Oribatida)     | 3694.02 | $\pm$ | 857.21  | 4302.61 | $\pm$ | 1739.23 |
| Araneida                | 7.08    | $\pm$ | 7.08    | 7.08    | $\pm$ | 7.08    |
| Chilopoda               | 28.31   | $\pm$ | 18.72   | 49.54   | $\pm$ | 30.85   |
| Coleoptera adults       | 21.23   | $\pm$ | 21.23   | 21.23   | $\pm$ | 12.26   |
| Coleoptera larvae       | 84.92   | $\pm$ | 21.23   | 169.84  | $\pm$ | 76.55   |
| Collembola              | 1450.72 | $\pm$ | 708.94  | 629.82  | $\pm$ | 374.46  |
| Diplopoda               | 183.99  | $\pm$ | 152.27  | 7.08    | $\pm$ | 7.08    |
| Diplura                 | -       |       |         | 7.08    | $\pm$ | 7.08    |
| Diptera larvae          | 28.31   | $\pm$ | 18.72   | 77.84   | $\pm$ | 39.40   |
| Hemiptera               | 21.23   | $\pm$ | 0.00    | 7.08    | $\pm$ | 7.08    |
| Hymenoptera             | -       |       |         | -       |       |         |
| Orthoptera              | -       |       |         | -       |       |         |
| Paupoda                 | -       |       |         | -       |       |         |
| Protura                 | 14.15   | $\pm$ | 7.08    | 99.07   | $\pm$ | 99.07   |
| Psocoptera              | 7.08    | $\pm$ | 7.08    | -       |       |         |
| Symphyla                | 14.15   | $\pm$ | 14.15   | 21.23   | $\pm$ | 12.26   |
| Thysanoptera            | 7.08    | $\pm$ | 7.08    | 7.08    | $\pm$ | 7.08    |
| b)                      | MO1     |       |         | MO2     |       |         |
| Acarina (non Oribatida) | 1818.70 | $\pm$ | 1095.65 | 1903.62 | $\pm$ | 705.43  |
| Acarina (Oribatida)     | 2979.28 | $\pm$ | 1569.51 | 5866.56 | $\pm$ | 3329.85 |
| Araneida                | 106.15  | $\pm$ | 74.56   | 7.08    | $\pm$ | 7.08    |
| Chilopoda               | 99.07   | $\pm$ | 37.45   | -       |       |         |
| Coleoptera adults       | 99.07   | $\pm$ | 37.45   | 92.00   | $\pm$ | 30.85   |
| Coleoptera larvae       | 42.46   | $\pm$ | 12.26   | 155.69  | $\pm$ | 57.93   |
| Collembola              | 2370.68 | $\pm$ | 1057.98 | 2858.97 | $\pm$ | 1216.26 |
| Diplopoda               | 7.08    | $\pm$ | 7.08    | 7.08    | $\pm$ | 7.08    |
| Diplura                 | -       |       |         | -       |       |         |
| Diptera larvae          | 56.61   | $\pm$ | 37.45   | 113.23  | $\pm$ | 30.85   |
| Hemiptera               | 7.08    | $\pm$ | 7.08    | 42.46   | $\pm$ | 21.23   |
| Hymenoptera             | 14.15   | $\pm$ | 14.15   | 7.08    | $\pm$ | 7.08    |
| Orthoptera              | -       |       |         | -       |       |         |
| Paupoda                 | -       |       |         | -       |       |         |
| Protura                 | 7.08    | $\pm$ | 7.08    | -       |       |         |
| Psocoptera              | -       |       |         | 7.08    | $\pm$ | 7.08    |
| Symphyla                | 7.08    | $\pm$ | 7.08    | -       |       |         |
| Thysanoptera            | 7.08    | $\pm$ | 7.08    | -       |       |         |

| c)                      | SN1             | SN2             | SN3            | SN4             | SN5             | SN6             | SN7             | SN8             | SN9            | SN10            | SN11           |
|-------------------------|-----------------|-----------------|----------------|-----------------|-----------------|-----------------|-----------------|-----------------|----------------|-----------------|----------------|
| Acarina (non Oribatida) | 2384.84±241.85  | 9992.25±5287.95 | 1585.17±717.47 | 1974.39±489.67  | 1967.31±71.82   | 3665.71±1353.03 | 1712.55±497.94  | 3573.72±1514.26 | 566.13±324.83  | 113.23±83.43    | 254.76±76.55   |
| Acarina (Oribatida)     | 3134.96±1290.05 | 6843.14±2455.51 | 1344.57±740.96 | 2292.84±1191.97 | 4868.75±661.70  | 2257.46±1130.47 | 4939.51±2953.09 | 2738.67±1031.13 | 1082.73±694.56 | 70.77±60.46     | 183.99±99.83   |
| Araneida                | 28.31±28.31     | 42.46±32.43     | 63.69±53.43    | 134.46±39.40    | -               | 106.15±63.69    | -               | 7.08±7.08       | -              | -               | -              |
| Chilopoda               | 7.08±7.08       | 7.08±7.08       | -              | 127.38±36.77    | 35.38±7.08      | -               | 35.38±18.72     | 7.08±7.08       | 7.08±7.08      | -               | -              |
| Coleoptera adults       | 42.46±42.46     | 21.23±0.00      | 92.00±37.45    | 14.15±7.08      | 49.54±7.08      | 106.15±32.43    | 35.38±18.72     | 56.61±18.72     | 35.38±18.72    | 49.54±30.85     | -              |
| Coleoptera larvae       | 56.61±37.45     | 21.23±21.23     | 42.46±12.26    | 63.69±24.51     | 77.84±14.15     | 212.30±85.80    | 28.31±14.15     | 113.23±81.61    | 134.46±113.23  | 42.46±32.43     | 7.08±7.08      |
| Collembola              | 3156.19±1391.14 | 7664.03±6634.60 | 1655.94±546.37 | 3488.80±1179.83 | 2243.30±418.24  | 4345.07±2392.07 | 9539.35±7569.58 | 2179.61±880.16  | 325.53±178.61  | 6545.92±4325.62 | 1033.19±271.97 |
| Diplopoda               | 49.54±25.52     | 14.15±14.15     | 28.31±28.31    | 35.38±35.38     | 49.54±18.72     | 21.23±12.26     | 42.46±24.51     | 92.00±81.61     | 14.15±7.08     | -               | 14.15±14.15    |
| Diplura                 | -               | -               | -              | -               | -               | -               | -               | -               | -              | -               | -              |
| Diptera larvae          | 14.15±7.08      | 14.15±7.08      | 35.38±18.72    | 7.08±7.08       | 70.77±37.45     | 77.84±49.54     | 77.84±14.15     | 155.69±77.84    | -              | 21.23±12.26     | 21.23±21.23    |
| Hemiptera               | 509.52±345.16   | 7.08±7.08       | 35.38±7.08     | 42.46±24.51     | 3297.73±2441.31 | 70.77±51.03     | 35.38±7.08      | 261.84±166.41   | 7.08±7.08      | -               | 49.54±49.54    |
| Hymenoptera             | -               | -               | 92.00±92.00    | -               | 7.08±7.08       | 77.84±77.84     | -               | 35.38±7.08      | 14.15±14.15    | -               | -              |
| Orthoptera              | 7.08±7.08       | -               | -              | -               | -               | -               | -               | -               | -              | -               | -              |
| Pauropoda               | -               | -               | 7.08±7.08      | -               | -               | -               | -               | -               | -              | -               | -              |
| Protura                 | -               | 14.15±14.15     | -              | 63.69±32.43     | 7.08±7.08       | 63.69±53.43     | 7.08±7.08       | 7.08±7.08       | 14.15±7.08     | -               | 14.15±7.08     |
| Psocoptera              | -               | -               | -              | 49.54±49.54     | -               | 14.15±14.15     | -               | 14.15±14.15     | -              | 7.08±7.08       | -              |
| Symphyla                | 21.23±21.23     | 7.08±7.08       | 7.08±7.08      | 49.54±25.52     | 21.23±21.23     | 56.61±30.85     | 14.15±7.08      | 7.08±7.08       | 14.15±7.08     | 7.08±7.08       | 7.08±7.08      |
| Thysanoptera            | 7.08±7.08       | 7.08±7.08       | 162.76±57.93   | 28.31±28.31     | -               | -               | -               | 7.08±7.08       | 7.08±7.08      | -               | -              |

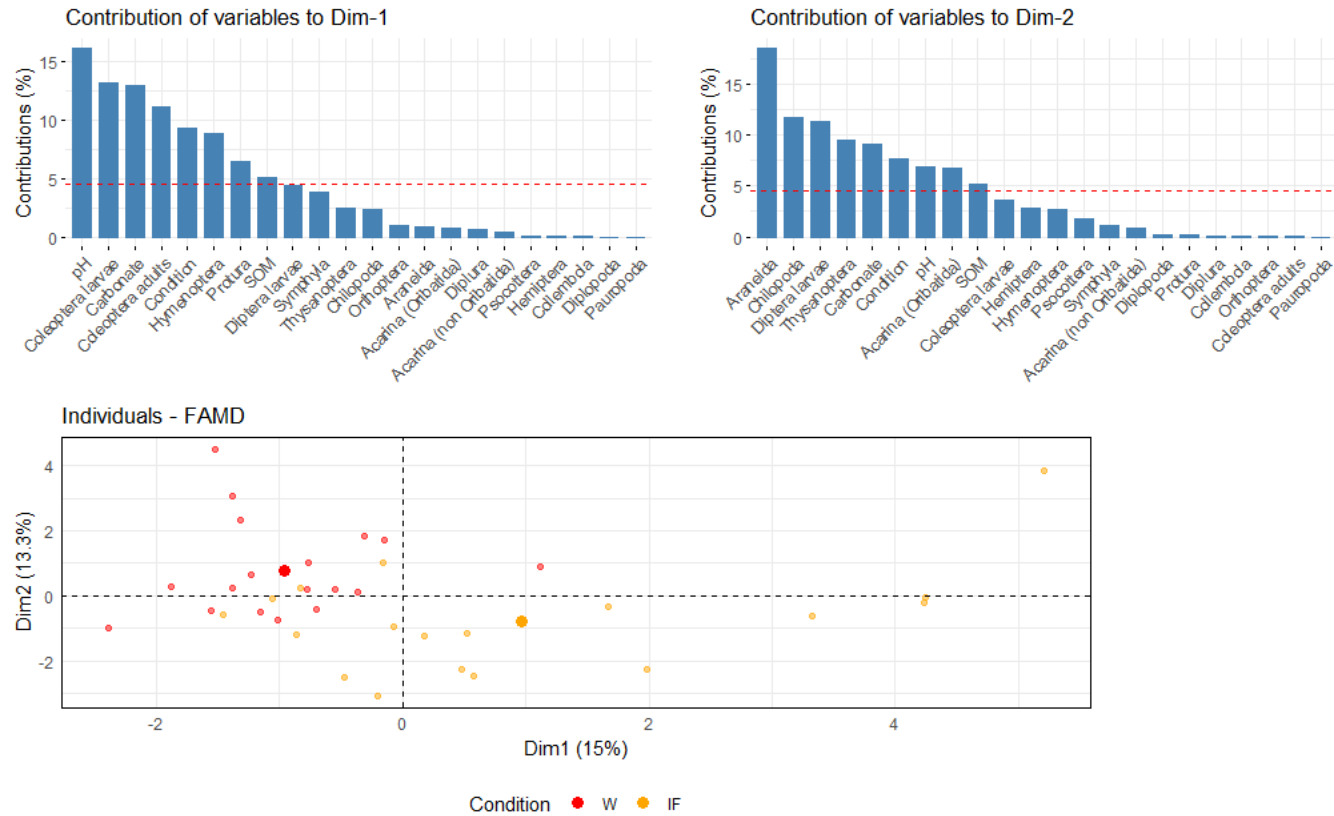

Figure S1. FAMD output. **(a)** and **(b)** show the contribution of variables to the dimensions 1 and 2 respectively. The red dashed line indicates the expected average value if the contributions were uniform. In **(c)** the results for qualitative variables are shown.
